# Supplementary material for: Cross-sectional analysis of sleep hours and quality with sex hormones in men
Source: PubMed Central journal article supplement — Endocr Connect. 2019 Jan 22;8(2):141–9. doi: 10.1530/EC-18-0548 (PMC6376994; doi:10.1530/ec-18-0548), 2019-01-22
Supplement: supplementary_figure_2.pdf [file supplementary_figure_2.pdf]

**Supplemental figure 6.** Predicted values of selected hormones as a function of hours of sleep according to generalized additive models.

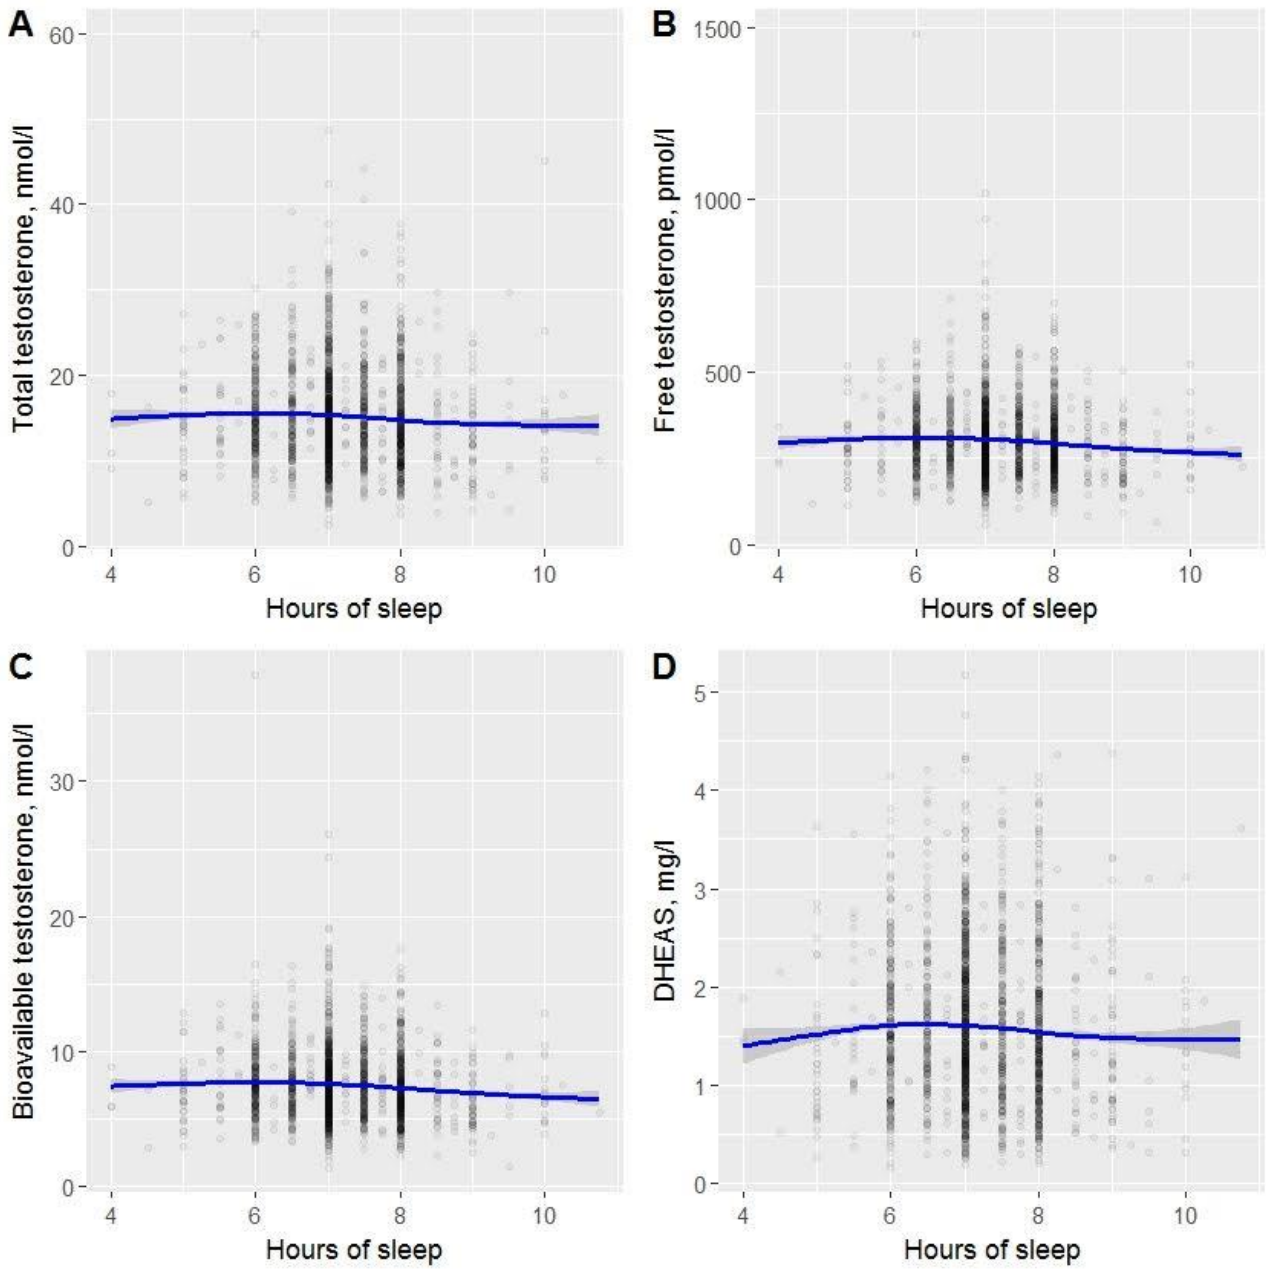

DHEAS, dehydroepiandrosterone-sulphate.
