# Supplementary material for: Cross-sectional analysis of sleep hours and quality with sex hormones in men
Source: PubMed Central journal article supplement — Endocr Connect. 2019 Jan 22;8(2):141–9. doi: 10.1530/EC-18-0548 (PMC6376994; doi:10.1530/ec-18-0548), 2019-01-22
Supplement: supplementary_table_1.pdf [file supplementary_table_1.pdf]

**Supplemental table 1.** Characteristics of the population (n=2095) and associations of testosterone, SHBG and DHEAS with

relevant cofounders.

|                                    |                            | Bioavaible testo (nmol/L) | Free testo (nmol/L)   | Free testo (pmol/L) | DHEAS (mg/l)    |
|------------------------------------|----------------------------|---------------------------|-----------------------|---------------------|-----------------|
|                                    |                            | Median (IQR)              | Median (IQR)          | Median (IQR)        | Median (IQR)    |
| Often sleepless                    | Yes                        | 6.8 (5.3; 8.4)            | 279.0 (210.7; 352.2)  | 28.1 (23.1; 37.0)   | 1.4 (0.9; 2.1)  |
|                                    | No                         | 7.3 (5.8; 8.8)            | 291.1 (235.1; 353.3)  | 31.3 (24.2; 40.9)   | 1.4 (1.0; 2.0)  |
|                                    |                            | p=.012                    | p=.010                | p=.004              | p=.539          |
| Often very tired                   | Yes                        | 7.2 (5.6; 9.1)            | 292.9 (228.5; 369.7)  | 30.3 (23.7; 38.4)   | 1.4 (0.9; 2.1)  |
|                                    | No                         | 7.2 (5.8; 8.7)            | 289.2 (233.4; 350.8)  | 31.1 (24.1; 40.8)   | 1.5 (1.0; 2.0)  |
|                                    |                            | p=.985                    | p=.748                | p=.165              | p=.496          |
| Self-reported total hours of sleep | <7 hours of sleep          | 7.3 (5.99; 8.89)          | 294.3 (241.0; 359.4)  | 31.0 (25.3; 40.9)   | 1.49 (1.0; 2.0) |
|                                    | 7-9 hours of sleep         | 7.2 (5.75; 8.76)          | 289.6 (231.1; 352.4)  | 30.9 (23.8; 39.8)   | 1.44 (1.0; 2.1) |
|                                    | >9 hours of sleep          | 5.9 (4.76; 7.58)          | 245.7 (192.4; 316.6)  | 32.4 (21.4; 44.4)   | 1.21 (0.8; 1.8) |
|                                    |                            | p<.001                    | p<.001                | p=.456              | p=.014          |
| Age                                | 35-45                      | 8.5 (7.0; 10.3)           | 336.4 (276.0; 399.5)  | 26.3 (19.5; 33.0)   | 1.9 (1.5; 2.5)  |
|                                    | 45-55                      | 7.3 (5.9; 8.9)            | 295.1 (236.1; 356.5)  | 30.5 (23.7; 39.3)   | 1.5 (1.1; 2.1)  |
|                                    | 55-60                      | 6.3 (5.1; 7.7)            | 259.77 (208.2; 322.1) | 35.2 (27.0; 45.1)   | 1.1 (0.7; 1.5)  |
|                                    |                            | p<.001                    | p<.001                | p<.001              | p<.001          |
| Body mass index                    | Underweight (<18,5 kg/m2)  | 6.7 (5.8; 7.3)            | 286.1 (230.6; 328.0)  | 65.6 (32.6; 87.7)   | 2.0 (0.6; 2.8)  |
|                                    | Normal (18,5-25 kg/m2)     | 7.7 (6.2; 9.5)            | 310.2 (247.5; 376.5)  | 36.1 (27.9; 45.2)   | 1.6 (1.1; 2.1)  |
|                                    | Overweight (25-30 kg/m2)   | 7.3 (5.9; 8.8)            | 292.9 (235.4; 355.8)  | 30.0 (23.9; 38.2)   | 1.4 (1.0; 2.0)  |
|                                    | Obese (>30 kg/m2)          | 6.1 (4.8; 7.4)            | 251.0 (200.1; 300.5)  | 26.2 (19.9; 34.5)   | 1.3 (0.8; 1.9)  |
|                                    |                            | p<.001                    | p<.001                | p<.001              | p<.001          |
| Smoking status                     | Daily smoker               | 7.8 (6.1; 9.4)            | 320.0 (247.1; 384.7)  | 35.4 (26.9; 44.4)   | 1.7 (1.1; 2.3)  |
|                                    | Occasional smoker          | 6.9 (5.4; 8.3)            | 278.8 (218.4; 325.0)  | 26.8 (21.5; 34.6)   | 1.5 (1.0; 1.9)  |
|                                    | Former smoker              | 6.8 (5.5; 8.4)            | 275.0 (218.2; 336.0)  | 30.2 (23.3; 38.9)   | 1.3 (1.0; 1.9)  |
|                                    | Never smoker               | 5.9 (5.9; 8.7)            | 288.2 (237.6; 347.1)  | 29.9 (23.4; 39.2)   | 1.5 (1.0; 2.1)  |
|                                    |                            | p<.001                    | p<.001                | p<.001              | p<.001          |
| Alcohol intake (units per week)    | 0 units of alcohol         | 7.2 (5.5; 9.2)            | 284.9 (218.9; 370.9)  | 31.1 (25.1; 42.8)   | 1.4 (0.9; 2.1)  |
|                                    | 1-14 units of alcohol      | 7.3 (5.8; 8.7)            | 291.4 (231.7; 349.4)  | 30.8 (23.7; 39.6)   | 1.4 (1.0; 2.0)  |
|                                    | > 14 units of alcohol      | 7.1 (5.8; 8.8)            | 287.0 (234.9; 256.5)  | 31.2 (24.6; 41.2)   | 1.5 (1.1; 2.1)  |
|                                    |                            | p=.969                    | p=.893                | p=.449              | p=.003          |
| Physical activity                  | Mainly sedentary           | 6.8 (5.6; 8.5)            | 277.1 (227.9; 347.3)  | 28.9 (21.6; 37.6)   | 1.4 (1.0; 2.1)  |
|                                    | Light to moderate activity | 7.2 (5.7; 8.7)            | 288.9 (229.3; 351.9)  | 30.8 (23.8; 39.8)   | 1.4 (1.0; 2.0)  |
|                                    | Regular sport and exercise | 7.4 (6.0; 8.9)            | 295.5 (242.6; 360.9)  | 33.5 (26.3; 42.3)   | 1.5 (1.0; 2.0)  |
|                                    | Athletic training          | 8.0 (6.6; 9.7)            | 320.7 (263.5; 372.9)  | 31.0 (22.2; 42.9)   | 1.6 (1.2; 2.2)  |
|                                    |                            | p=.003                    | p=.035                | p<.001              | p=.317          |

P-values are found with the Kruskal-Wallis test.

Bio testosterone, Bioavaible testosterone; SHBG, sex-hormone binding globulin; DHEAS, dehydroepiandrosterone-sulphate, IQR; interquartile range.
