# Supplementary material for: Cross-sectional analysis of sleep hours and quality with sex hormones in men
Source: PubMed Central journal article supplement — Endocr Connect. 2019 Jan 22;8(2):141–9. doi: 10.1530/EC-18-0548 (PMC6376994; doi:10.1530/ec-18-0548), 2019-01-22
Supplement: supplementary_table_2.pdf [file supplementary_table_2.pdf]

**Supplemental table 2.** The relationship between potential confounders, hypogonadism, comorbidities and sleep duration (self-reported total hours of sleep per day). P-values represent results from chi-square test.

|                                                                           | (n=2095)                              | Self-reported total hours of sleep / n, (%) |                    |                   | p-value |
|---------------------------------------------------------------------------|---------------------------------------|---------------------------------------------|--------------------|-------------------|---------|
|                                                                           |                                       | <7 hours of sleep                           | 7-9 hours of sleep | >9 hours of sleep |         |
| Age                                                                       | 35-45                                 | 74 (30.3)                                   | 168 (68.9)         | 2 (0.8)           | p<0.001 |
|                                                                           | 45-55                                 | 326 (24.8)                                  | 945 (72.0)         | 42 (3.2)          |         |
|                                                                           | 55-60                                 | 91 (16.9)                                   | 405 (75.3)         | 42 (7.8)          |         |
| Body mass index                                                           | Normal (18,5-25 kg/m <sup>2</sup> )   | 144 (22.0)                                  | 483 (73.5)         | 30 (4.6)          | p=0.458 |
|                                                                           | Overweight (25-30 kg/m <sup>2</sup> ) | 252 (24.1)                                  | 758 (72.5)         | 36 (3.4)          |         |
|                                                                           | Obese (>30 kg/m <sup>2</sup> )        | 95 (24.2)                                   | 277 (79.7)         | 20 (5.1)          |         |
| Smoking status                                                            | Daily smoker                          | 139 (30.5)                                  | 288 (63.2)         | 29 (6.4)          | p<0.001 |
|                                                                           | Occasional smoker                     | 19 (26.0)                                   | 50 (68.5)          | 4 (5.5)           |         |
|                                                                           | Former smoker                         | 156 (20.8)                                  | 560 (74.7)         | 34 (4.5)          |         |
|                                                                           | Never smoker                          | 177 (21.7)                                  | 620 (76.0)         | 19 (2.3)          |         |
| Alcohol intake (units per week)                                           | 0 units of alcohol                    | 19 (15.5)                                   | 93 (76.6)          | 11 (8.9)          | p<0.001 |
|                                                                           | 1-14 units of alcohol                 | 323 (26.7)                                  | 851 (70.5)         | 34 (2.8)          |         |
|                                                                           | > 14 units of alcohol                 | 149 (19.5)                                  | 574 (73.1)         | 41 (5.4)          |         |
| Physical activity                                                         | Mainly sedentary                      | 80 (24.6)                                   | 219 (67.4)         | 26 (8.0)          | p<0.001 |
|                                                                           | Light to moderate activity            | 275 (21.5)                                  | 950 (74.4)         | 52 (4.1)          |         |
|                                                                           | Regular sport and exercise            | 130 (28.4)                                  | 320 (69.9)         | 8 (1.8)           |         |
|                                                                           | Athletic training                     | 6 (17.1)                                    | 29 (82.9)          | 0 (0)             |         |
| Comorbidities (n=1962)                                                    |                                       |                                             |                    |                   |         |
| Has a doctor ever told you that you had asthma?                           | Yes                                   | 31 (23.7)                                   | 91 (69.5)          | 10 (7.6)          | p=0.046 |
|                                                                           | No                                    | 431 (23.6)                                  | 1334 (72.9)        | 65 (3.6)          |         |
| Has a doctor ever told you that you had a myocardial infarction?          | Yes                                   | 5 (41.7)                                    | 5 (41.7)           | 2 (16.7)          | p=0.014 |
|                                                                           | No                                    | 457 (23.4)                                  | 1420 (72.8)        | 73 (3.7)          |         |
| Have you been diagnosed with diabetes?                                    | Yes                                   | 3 (12.5)                                    | 16 (69.7)          | 5 (20.8)          | p<0.001 |
|                                                                           | No                                    | 459 (23.7)                                  | 1409 (72.7)        | 70 (3.61)         |         |
| Do you take heart medication?                                             | Yes                                   | 29 (23.2)                                   | 86 (68.8)          | 10 (8.0)          | p=0.041 |
|                                                                           | No                                    | 433 (23.6)                                  | 1339 (72.9)        | 65 (3.5)          |         |
| Have you within the past few weeks taken cholesterol-lowering medication? | Yes                                   | 22 (18.8)                                   | 89 (73.6)          | 10 (8.5)          | p=0.016 |
|                                                                           | No                                    | 440 (23.9)                                  | 1336 (72.6)        | 65 (3.5)          |         |
