# Supplementary material for: Cross-sectional analysis of sleep hours and quality with sex hormones in men
Source: PubMed Central journal article supplement — Endocr Connect. 2019 Jan 22;8(2):141–9. doi: 10.1530/EC-18-0548 (PMC6376994; doi:10.1530/ec-18-0548), 2019-01-22
Supplement: supplementary_table_3.pdf [file supplementary_table_3.pdf]

**Supplemental table 3.** Results from multivariable linear regression analyses of male serum reproductive hormones, SHBG and DHEAS among Danish men according to self-reported hours of sleep per day.

|                                    |                             | Sleep in hours (continuous- and categorized variable) / $\beta$ (95% CI), p-value |                |         |                      |               |         |
|------------------------------------|-----------------------------|-----------------------------------------------------------------------------------|----------------|---------|----------------------|---------------|---------|
|                                    |                             | Model 3* (n=2095)                                                                 |                |         | Model4** (n=1962)*** |               |         |
| Free testosterone (pmol/L)         | Sleep in hours (continuous) | -6.4                                                                              | (-11.4; -1.4)  | p=0.012 | -6.6                 | (-11.8; -1.4) | p=0.013 |
|                                    | < 7 hours of sleep          | 2.1                                                                               | (-8.2; 12.3)   | p=0.692 | 3.0                  | (-7.5; 13.5)  | p=0.571 |
|                                    | 7-9 hours of sleep          | 0 (reference)                                                                     |                |         | 0 (reference)        |               |         |
|                                    | > 9 hours of sleep          | -35.5                                                                             | (-57.4; -13.6) | p=0.001 | -33.2                | (-56.5; 9.9)  | p=0.005 |
| Bioavailable testosterone (nmol/L) | Sleep in hours (continuous) | -0.2                                                                              | (-0.3; -0.0)   | p=0.014 | -0.2                 | (-0.3; -0.0)  | p=0.017 |
|                                    | < 7 hours                   | 0.0                                                                               | (-0.2; 0.3)    | p=0.803 | 0.0                  | (-0.2; 0.3)   | p=0.647 |
|                                    | 7-9 hours                   | 0 (reference)                                                                     |                |         | 0 (reference)        |               |         |
|                                    | > 9 hours                   | -0.8                                                                              | (-1.4; -0.3)   | p=0.003 | -0.8                 | (-1.3; 0.2)   | p=0.009 |
| Total testosterone (nmol/L)        | Sleep in hours (continuous) | -0.31                                                                             | (-0.6; -0.1)   | p=0.020 | -0.3                 | (-0.6; -0.1)  | p=0.019 |
|                                    | < 7 hours                   | 0.29                                                                              | (-0.3; 0.8)    | p=0.310 | 0.3                  | (-0.5; 0.9)   | p=0.284 |
|                                    | 7-9 hours                   | 0 (reference)                                                                     |                |         | 0 (reference)        |               |         |
|                                    | > 9 hours                   | -1.43                                                                             | (-2.6; -0.3)   | p=0.018 | -1.4                 | (-2.6; -0.1)  | p=0.034 |
| SHBG (nmol/L)                      | Sleep in hours (continuous) | -0.3                                                                              | (-0.92; 0.30)  | p=0.318 | -0.33                | (-0.97; 0.31) | p=0.313 |
|                                    | < 7 hours                   | 1.1                                                                               | (-0.15; 2.34)  | p=0.085 | 0.99                 | (-0.29; 2.28) | p=0.129 |
|                                    | 7-9 hours                   | 0 (reference)                                                                     |                |         | 0 (reference)        |               |         |
|                                    | > 9 hours                   | 0.4                                                                               | (-2.28; 3.05)  | p=0.776 | 0.38                 | (-2.47; 3.24) | p=0.792 |
| DHEAS (nmol/L)                     | Sleep in hours (continuous) | -0.1                                                                              | (-0.0; 0.0)    | p=0.657 | -0.0                 | (-0.0; 0.0)   | p=0.903 |
|                                    | < 7 hours                   | -0.0                                                                              | (-0.1; 0.0)    | p=0.360 | -0.0                 | (-0.1; 0.0)   | p=0.435 |
|                                    | 7-9 hours                   | 0 (reference)                                                                     |                |         | 0 (reference)        |               |         |
|                                    | > 9 hours                   | -0.1                                                                              | (-0.3; 0.0)    | p=0.146 | -0.1                 | (-0.3; 0.1)   | p=0.368 |

\* adjusted for age, smoking, BMI, alcohol intake and physical activity, \*\* further adjusted for asthma, myocardial infarction,

diabetes, heart medication, and cholesterol-lowering medication.

\*\*\* 133 participants were excluded in the present analyses, due to incomplete information on co-morbidities.

SHBG, sex-hormone binding globulin; DHEAS, dehydroepiandrosterone-sulphate.
