# Supplementary figures and images for: Cross-sectional analysis of sleep hours and quality with sex hormones in men
Source: PubMed Central journal article supplement — Endocr Connect. 2019 Jan 22;8(2):141–9. doi: 10.1530/EC-18-0548 (PMC6376994; doi:10.1530/ec-18-0548), 2019-01-22

# Smoothing component (hours of sleep) for male hormones

DF=1, p=0.149

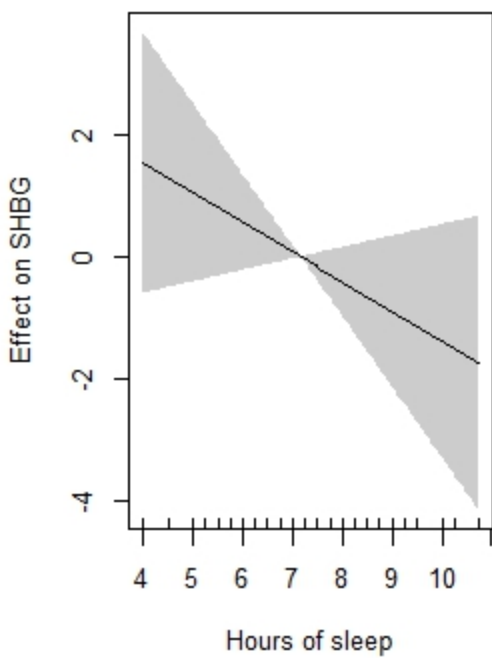

DF=2, p=0.098

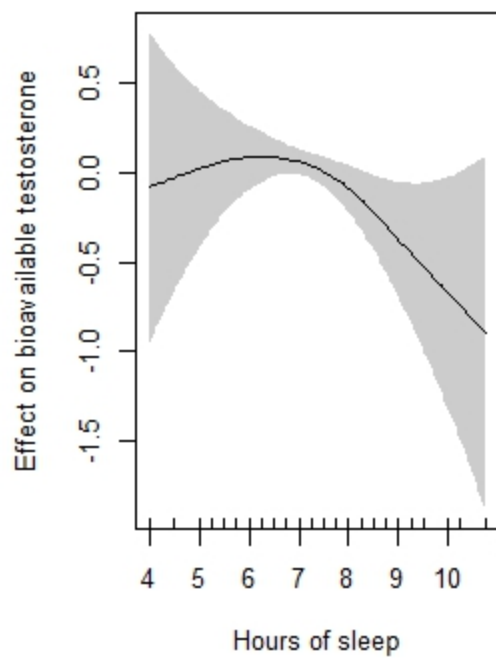

DF=2, p=0.054

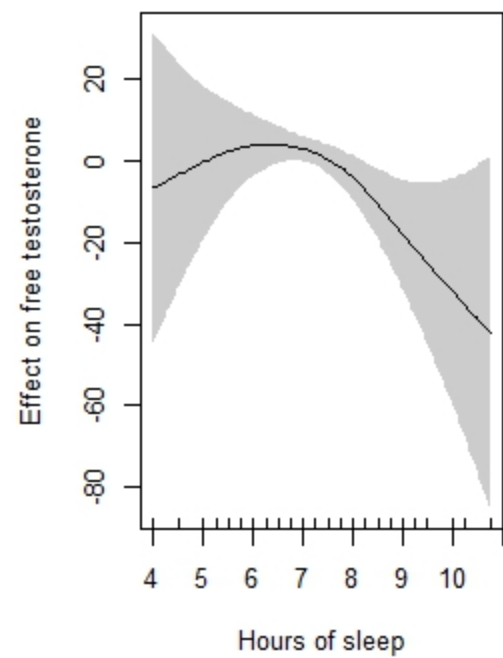

DF=2, p=0.08

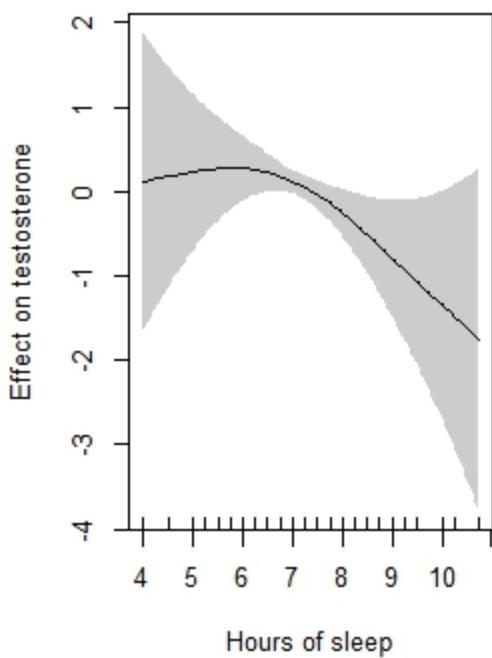

DF=3, p=0.205

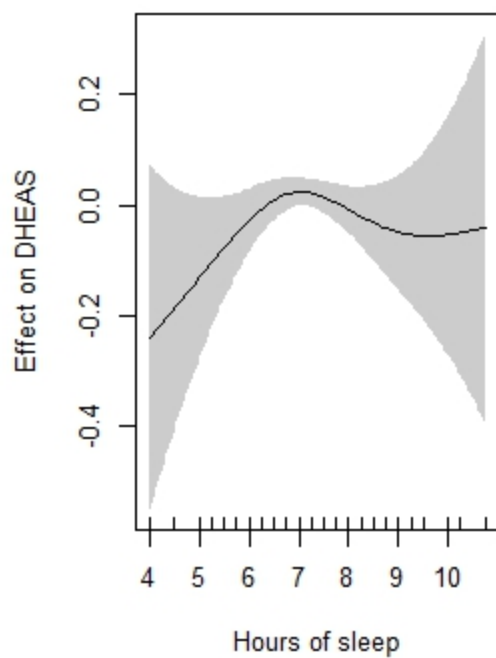

Supplement: supplementary_figure_1.pdf [file supplementary_figure_1.pdf]
